# Supplementary material for: Human DNA ligase III bridges two DNA ends to promote specific intermolecular DNA end joining
Source: PubMed Central journal article supplement (PMC4538836; doi:10.1093/nar/gkv652), 2015-06-29

**Supplementary Table 1.** Apparent DNA binding affinities of LigIII proteins used in this study. DNA binding activity was measured in TR-FRET buffer containing 80 mM NaCl by fluorescence polarization. A FITC labelled DNA was used to form a 1:1 complex of LigIII bound to a DNA duplex.

|             | <b>K<sub>app</sub> (nM)</b> |
|-------------|-----------------------------|
| LigIII      | 155 ± 4                     |
| ΔZnF LigIII | 166 ±20                     |
| ΔOBD LigIII | 308 ±13                     |

**Supplementary Table 2.** Structural parameters for LigIII and DNA complexes from SAXS data

| <b>SAXS sample</b>                           | <b>D<sub>max</sub> (Å)</b> | <b>R<sub>g</sub><sup>#</sup> (Å)</b> |
|----------------------------------------------|----------------------------|--------------------------------------|
| LigIII                                       | ~198                       | 59                                   |
| LigIII with DNA (3 nucleotide overhang)      | ~200                       | 59                                   |
| LigIII with a nicked DNA duplex              | ~200                       | 59                                   |
| ΔZnF LigIII                                  | ~130                       | 38                                   |
| ΔZnF LigIII with DNA (3 nucleotide overhang) | ~117                       | 34                                   |
| ΔZnF LigIII with a nicked DNA duplex         | ~115                       | 33                                   |
| ΔOBD LigIII                                  | ~141                       | 46                                   |
| ΔOBD LigIII with DNA (3 nucleotide overhang) | ~130                       | 43                                   |
| ΔOBD LigIII with a nicked DNA duplex         | ~125                       | 40                                   |

<sup>#</sup> R<sub>g</sub> is the radius of gyration calculated from the Guinier approximation. D<sub>max</sub> is the maximum dimension of the protein estimated from the pair distribution (*cf.* Figure 6).

**Supplementary Figure 1:** Positive and Negative controls for the TR-FRET DNA bridging assay.

**(A)** An intact DNA duplex (DNA1) labeled with  $Tb^{3+}$  and FITC on both 5' ends served as a standard to determine the maximum TR-FRET signal generated by our assay conditions. Dually labeled DNA1 (10 nM) was mixed with unlabeled DNA (500 nM) to mimic standard assay conditions. This sample produced a constant TR-FRET signal of 3.0, approximately 1.5- to 2-fold higher than the TR-FRET signal generated in a DNA bridging assay, which uses a limiting concentration of LigIII (see Figure 2 and Methods). Dual labeled, nicked DNAs (DNA2, DNA3) showed intermediate values of TR-FRET (2.0 to 2.5) that may reflect differences in the labeling efficiencies for these DNAs. **(B)** Human DNA ligase 1 (100nM) failed to generate a TR-FRET signal and lacks the zinc finger domain that is required for DNA bridging by LigIII.

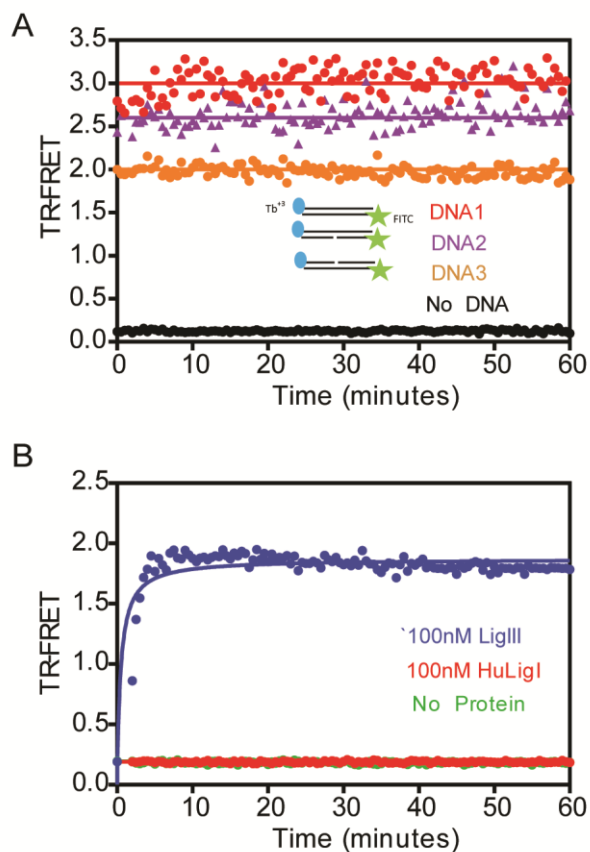

**Supplementary Figure 2:** Dissociation of labeled DNAs from the bridging complex. Addition of an unlabeled competitor DNA resulted in the loss of the TR-FRET signal with an apparent rate of  $0.1 \text{ min}^{-1}$  in the presence of a saturating amount of competitor DNA.

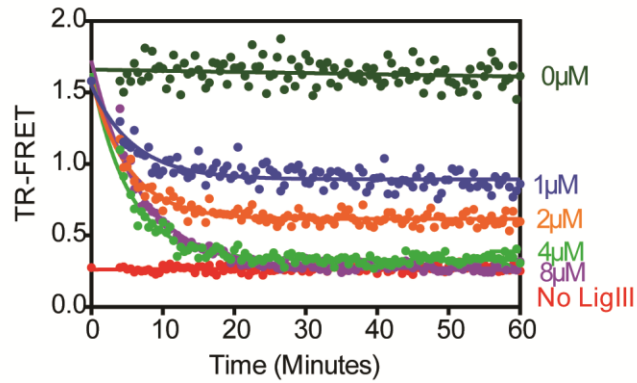

**Supplementary Figure 3:** Pull-down of blunt-ended DNAs in a bridging complex. The pull-down assay was performed as described in the Methods, using a pair of blunt-ended DNAs. LigIII forms a bridging complex with blunt-ended DNAs in a manner similar to the complex with three-nucleotide overhangs shown in Figure 8.

|              |   |   |   |   |   |   |   |
|--------------|---|---|---|---|---|---|---|
| LigIII       | - | - | - | + | - | + | + |
| FITC - DNA   | - | - | + | + | + | - | + |
| Biotin - DNA | - | + | + | + | - | + | - |

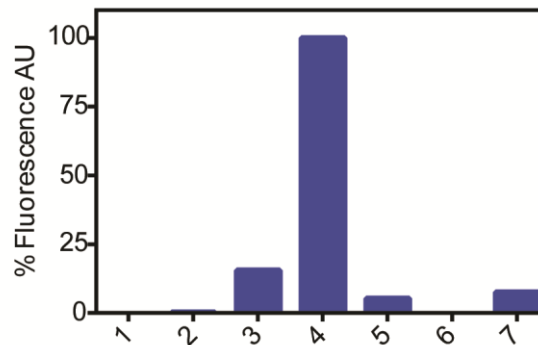

**Supplementary Figure 4:** DNA binding of adenylated and deadenylated LigIII. FITC labelled dsDNA (25 nM) or a nicked DNA duplex (25 nM) was titrated with increasing concentrations of (A) adenylated LigIII or (B) deadenylated LigIII. The formation of a protein-DNA complex is indicated by an increase in fluorescence anisotropy. Adenylated and deadenylated LigIII show comparable DNA binding activity.

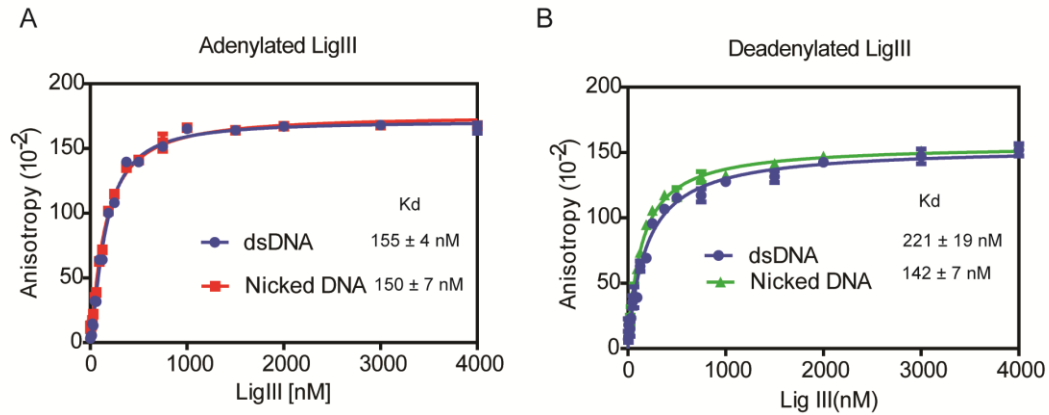

**Supplementary Figure 5:** Intermolecular DNA ligation by LigIII. The time course of DNA ligation was monitored for substrates with complementary 3-nucleotide overhangs (A) or with blunt ends (B). The rate of blunt end ligation catalyzed by LigIII is significantly slower than the ligation of DNAs with complementary overhangs.

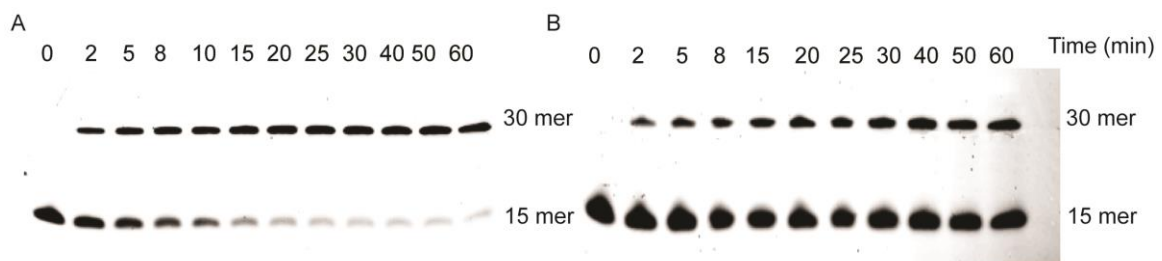

Supplement: supp_gkv652_nar-00686-h-2015-File010.pdf [file supp_gkv652_nar-00686-h-2015-File010.pdf]
